# Supplementary material for: Genome-Wide Association Identifies Nine Common Variants Associated With Fasting Proinsulin Levels and Provides New Insights Into the Pathophysiology of Type 2 Diabetes
Source: Oxford University Press journal article supplement (doi:10.2337/db11-0415), 2011-08-27
Supplement: db110415supplementarydata1.xls [file db110415supplementarydata1.xls]

## Sheet: Cohorts
Supplementary Table 1: Cohort information
	DISCOVERY				FOLLOW-UP
COHORT	FHS	PROCARDIS	Fenland	DGI	RISC	ULSAM	PIVUS	Ely	METSIM	Segovia	SDPP	HBCS	Botnia-PPP	GENDAI	GHRAS	Hertfordshire
Country	USA	Germany, Italy, Sweden, UK	UK	Sweden, Finland	Europe	Sweden	Sweden	United Kingdom	Finland	Spain	Sweden	Finland	Finland	Greece	Greece	United Kingdom
Proinsulin assay	Linco HUMAN PROINSULIN RIA	ELISA (Dako Diagnostics Ltd)	DELFIA in-house assay with a sensitvity of 1.25pmol/L	Human Proinsulin RIA, Linco Research, (Malmö)	two-sited, time-resolved fluoroimmunoassay (AutoDELFIA Insulin kit)	Cambridge antibodies RIA	Two-site immunometric assay technique	Immunoradiometric assay	RIA, Linco Research	RIA, Linco Research	ELISA (Dako)	Two site immunometric assay	Human Proinsulin RIA, Linco Research, (Malmö)	Human Proinsulin Elisa (R&D)	Human Proinsulin Elisa (R&D)	Two site immunometric assay
Insulin assay	Linco HUMAN INSULIN SPECIFIC RIA	ELISA (Dako Ltd)	1235 AutoDELFIA automatic immunoassay system using a two-step time resolved fluorometric assay Kit No. B080-101 (Perkin Elmer)	fluoroimmunometric assay (AutoDelfia, Perkin Elmer Finland, Turku, Finland)	two-sited, time-resolved fluoroimmunoassay (AutoDELFIA Insulin kit)	Immunoreactive insulin: Enzymatic-immunological assay (Enzymun, Boehringer Mannheim)	Immunoreactive insulin: Enzymatic-immunological assay (Enzymun, Boehringer Mannheim)	Immunometricassay	ADVIA Centaur Insulin IRI. Siemens Medical Solutions Diagnostics	RIA, Linco Research	radioimmunoassay using in-house anti-porcine insulin antibodies	Two site immunometric assay	fluoroimmunometric assay (AutoDelfia, Perkin Elmer Finland, Turku, Finland)	Immunofluorescence	Immunofluorescence	Immunofluorimetric two-site assays (DELFIA system)
Samples with PROINSULIN phenotype N all (% males/% females)	5759 (46.7/53.3)	3259 (73.8/26.2)	1372 (43.8/56.2)	311 (51,5/48,5)	914 (43.76/56.24)	939 (100/0)	912 (48.79/51.21)	1568 (45.2/54.8)	5122 (100/0)	911 (46.8/53.2)	399 (100/0)	1649 (44.1, 55.9)	2280 (47/53)	906 (47.0/53.0)	668 (25.0/75.0)	1016 (56.5/43.5)
Age [Mean (sd) males/Mean (sd) females], years	48.5 (13.4)/48.9 (13.8)	58.3 (7.84)/61.6 (7.09)	44.40 (7.28)/45.37 (7.20)	58.85 (10.03)/59.92 (9.56)	43.45 (8.47)/44.56 (8.21)	70.96 (0.64)/	70.13 (0.17)/70.26 (0.15)	61.24 (9.09)/60.50 (9.07)	58.81 (6.43)/	5.31 (11.36)/52.53 (11.32)	45.7 (5.05)	61.6 (2.84)/61.5 (3.07)	46.3 (14.9)/46.6 (14.7)	11.18 (0.67)/11.17 (0.67)	74.32 (7.71)/70.70 (7.24)	65.05 (2.77)/65.73 (2.53)
BMI [Mean (sd) males/Mean (sd) females], kg/m2	28.2 (4.3)/26.8 (5.8)	27.0 (3.68)/26.9 (4.85)	27.58 (4.06)/26.61 (5.36)	27.67 (3.45)/27.61 (4.44)	26.56 (3.54)/24.97 (4.44)	26.00 (3.15)/	26.81 (3.64)/26.85 (4.66)	27.14 (3.88)/27.07 (5.41)	26.87 (3.76)/	27.14 (3.41)/27.39 (4.61)	24.2 (3.14)	27.0 (3.58)/27.3 (4.75)	26.7 (3.8)/25.9 (4.7)	20.28 (3.41)/19.61 (3.37)	28.39 (4.07)/30.15 (5.06)	26.58 (3.45)/26.83 (4.80)
Fasting intact proinsulin [Mean (sd) males/Mean (sd) females], pmol/l	12.29 (10.88)/9.24 (7.50)	5.50 (6.78)/5.11 (6.83)	4.18 (2.86)/2.82 (2.00)	13.13 (8.92)/10.25 (6.4)	9.76 (11.24)/7.29 (9.61)	7.08 (5.14)/	10.26 (7.78)/8.46 (7.01)	4.81 (3.51)/3.77 (2.78)	13.29 (6.15)/	11.67 (10.62)/9.39 (6.96)	7.91 (8.97)	5.63 (5.66)/4.16 (3.62)	12.0 (6.2)/10.2 (5.3)	16.65 (11.04)/16.15 (11.54)	11.41 (11.13)/12.19 (12.28)	3.49 (5.06)/3.24 (2.56)
Fasting insulin [Mean (sd) males/Mean (sd) females], pmol/l	25.65 (19.25)/22.49 (16.86)	59.04 (57.20)/54.72 (54.50)	51.04 (31.38)/41.40 (26.84)	48.00 (56.9)/38.64 (26.24)	35.96 (34.17)/30.76 (23.87)	73.52 (39.85)/	52.69 (32.72)/50.01 (30.41)	58.51 (35.11)/54.11 (34.73)	49.72 (34.72)/	12.05 (7.85)/11.71 (7.59)	18.47 (8.15)	10.79 (12.93)/9.57 (9.95)	38.7 (25.9)/36.3 (23.8)	41.97 (23.10)/48.71 (25.35)	51.13 (36.14)/52.43 (40.49)	85.99 (67.9)/82.57 (56.79)
Genotyping platform and SNP panel	Affymetrix 500K and MIPS 50K	Illumina Human1M and Illumina Human 610k	Affymetrix 500K Array Set	Affymetrix 500K	Applied Biosystems	SNPstream system (Beckman Coulter)	SNPstream system (Beckman Coulter)	iPLEX Sequenom MassARRAY	iPLEX Sequenom MassARRAY	iPLEX Sequenom	Applied Biosystems SNP genotyping assay	Applied Biosystems SNP genotyping assay	Applied Biosystems SNP genotyping assay	Sequenom	Sequenom	iPLEX Sequenom MassARRAY
Genotyping centre	Affymetrix	CNG and Uppsala SNP Technology Platform	Affymetrix	Broad Institute	Merck - candidate gene genotyping by Kbioscience	Uppsala SNP Technology Platform	Uppsala SNP Technology Platform	Wellcome Trust Sanger Institute	NHGRI	CEGEN	Karolinska Institutet, Stockholm	Karolinska Institutet, Stockholm	Diabetes & Endocrinology, Lund University, Malmö, Sweden	Sanger Cambridge, Sequenom Germany	Sanger Cambridge, Sequenom Germany	Wellcome Trust Sanger Institute
Genotyping calling algorithm	BRLMM	Beadstudio	BRLMM	BRLMM (Affymetrix)	ABI Prism 7000 sequence detection system	SNPstream GetGenos (Beckman Coulter)	SNPstream GetGenos (Beckman Coulter)	Sequenom MassArray Typer	Sequenom MassArray Typer	Sequenom	Applied Biosystems Sequence Detection System (2.3)	Applied Biosystems Sequence Detection System (2.3)	Applied Biosystems Sequence Detection System (2.3)	Sequenom Typer 4.0	Sequenom Typer 4.0	Sequenom MassArray Typer
Call rate [filter detail/N individuals excluded]	97%/77	95%/30	≥ 95%/1	95%/0
Heterozygosity [filter detail/N individuals excluded]	5 SD from mean (< 25.758% or > 29.958%)/12	-	heterozygosity upperbound 0.28822 lowerbound 0.27348/81	-
Ethnic outliers/other exclusions	> 1000 Mendelian errors/1	Ethnic outliers, cryptic IBS	failed relatedness and duplicate check/2	failed relatedness and duplicate check
Individuals for analysis	5759	3259	1372	311
MAF [filter detail/N SNPs excluded]	1%/67,012	0.01/24000	≥ 1%/55,271	>1%/3515
HWE [filter detail/N SNPs excluded]	10-6/20,469	10-6/600	> 10-6/3,690	>10-6/13
Call rate [filter detail/N SNPs excluded]	95%/23,099	95%/6000	≥ 90%/5,675	>95%/8400
SNP number in QC'd dataset	434,230/378,163	530000	362059	369981
Imputation software	MACH	MACH	IMPUTE (v0.4.2, genotyped SNPs used where available)	MACH
Imputation quality metrics	r2hat ≥ 0.3	snps with r2hat <0.3 were excluded	proper-info ≥ 0.40	r2hat > 0.3
Other SNP QC filters applied?	MAF ≥ 1%	before imputation: removed snps with call rate <95%, maf <1%, hwe p value <0.000001	MAF ≥ 1%	MAF ≥ 1%
Number of SNPs in analysis	2436547	2.4M	2555899	2372563	23	23	21	20	21	23	9	13	22	19	19	20
Software for analysis	LMEKIN (R package)	STATA	SNPtest v1.1.5	Plink/ProbABEL 0.0-6	STATA 10.0	STATA 10.1	STATA 10.1	STATA 10.1	Merlin	SPSS	Statistica	Statistica	SPSS	Plink	Plink	STATA 10.1
Genomic Control Lambda	1.037/1.031 (BMI)	1.01-1.03	1.021	1.002
